# Supplementary material for: Determination of the Unilaterally Damaged Region May Depend on the Asymmetry of Carotid Blood Flow Velocity in Hemiparkinsonian Monkey: A Pilot Study
Source: Hindawi journal article supplement (doi:10.1155/2022/4382145), 2022-01-01
Supplement: f1 [file 4382145.f1.zip]

# 1 Supplementary Materials

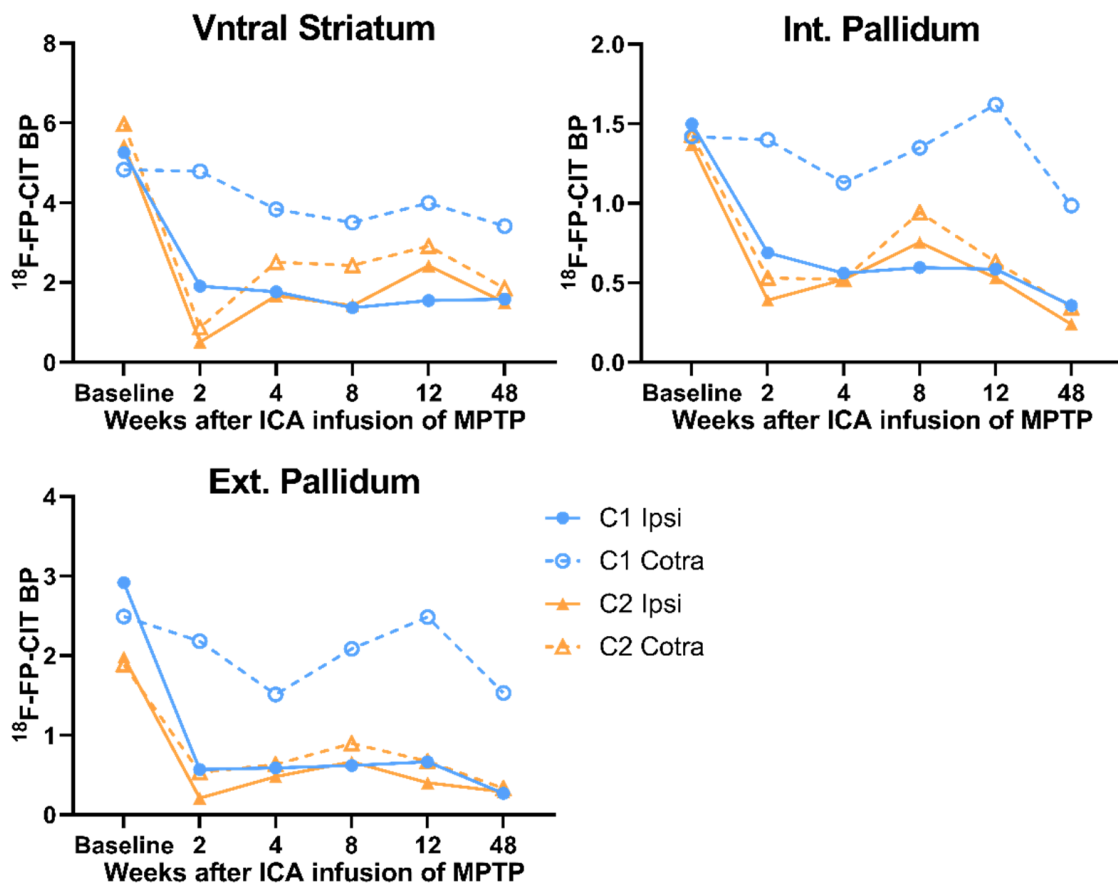

Supplemental Fig 1: Histogram representing  $^{18}\text{F}$ -FP-CIT binding potential in the dorsal striatum and sub-regions of the globus pallidus after left internal carotid artery infusion of MPTP. The dotted line indicates the contralateral dorsal striatum relative to the MPTP-infused side. Binding potential, BP; Contra, Contralateral; Ipsi, Ipsilateral.

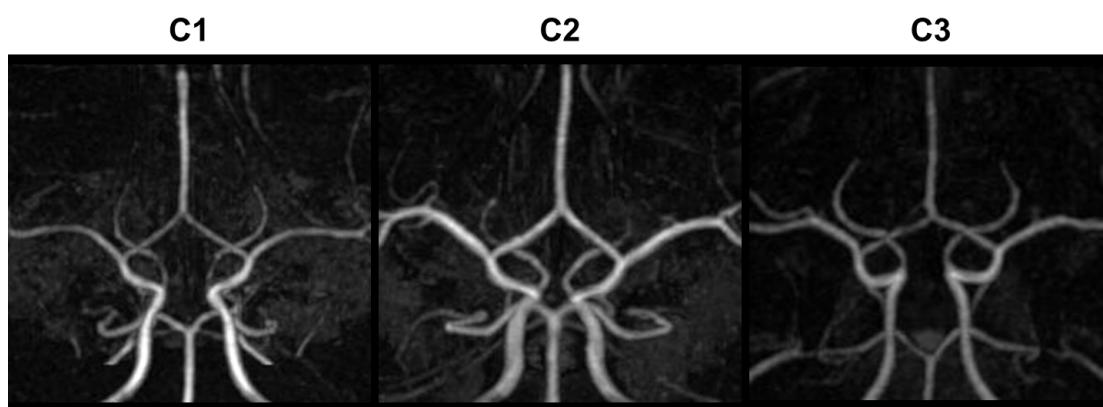

Supplemental Fig 2: (A) Magnetic resonance angiography (MRA) depicting the symmetric structure of the circle of Willis (CoW) in the cerebral arteries of all MPTP-infused cynomolgus monkeys.

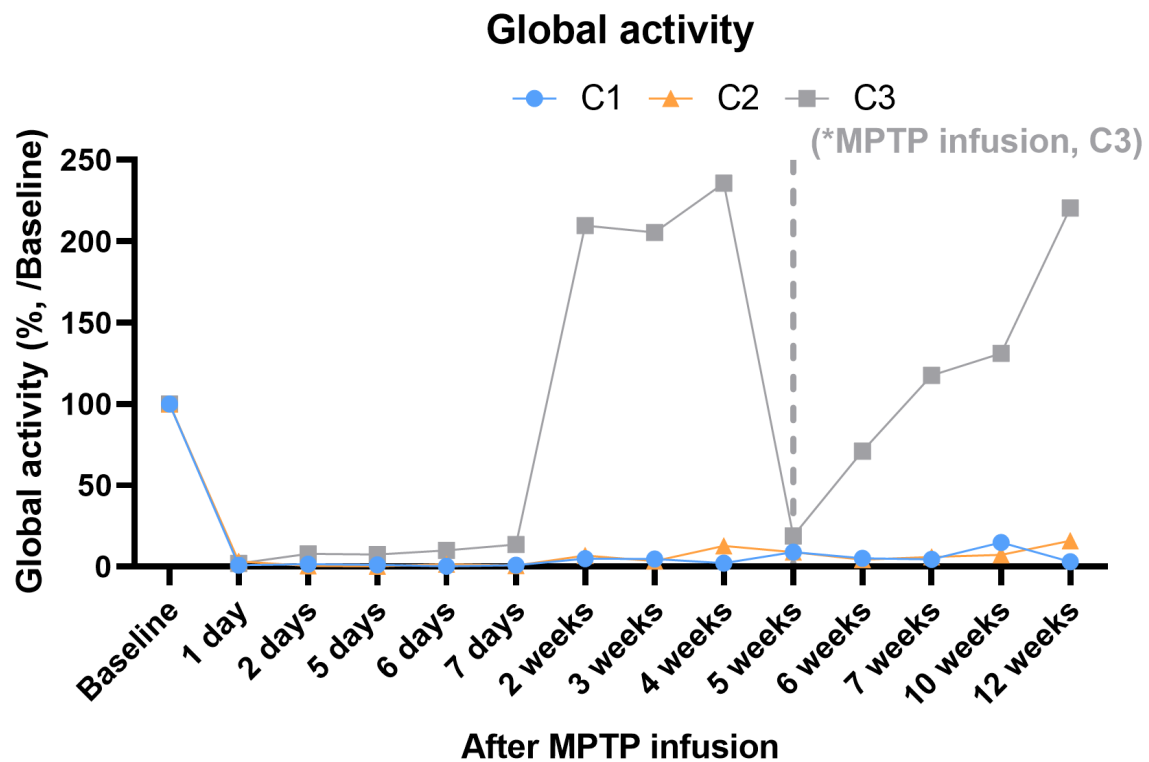

Supplemental Fig 3: Parkinsonian behavior scores were evaluated using the Kurlan scale. Parkinsonian behavior scores were increased after left internal carotid artery infusion of MPTP in unilaterally (C1) and bilaterally (C2) damaged cynomolgus monkeys. Parkinsonian behavior scores of the undamaged cynomolgus monkey (C3) was completely recovered despite additional infusion of MPTP. \*Additional contralateral infusion of MPTP in the undamaged cynomolgus monkey (C3).

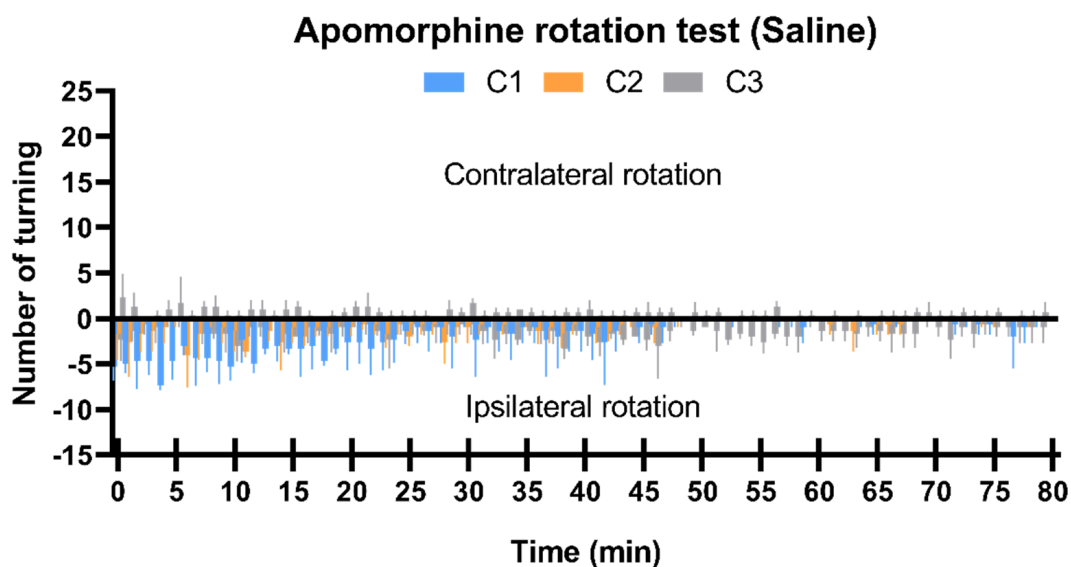

Supplemental Fig 4: Injection of saline was repeated thrice within 28 to 30 weeks, once a week, following MPTP infusion, for comparison with apomorphine rotation test. The ipsilateral rotations (negative values) were predominantly observed in C1 and C2 monkey (blue and orange bar) after saline injection. Contrastingly, ipsilateral and contralateral rotations were equally observed in the C3 monkey (gray bar). Plot, mean with standard deviation.

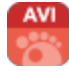

Supplemental  
Video 1.avi

Supplemental Video 1: Computed tomography angiography (CTA) depicting unilateral cerebral blood flow using a contrast media.

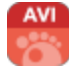

Supplemental  
Video 2 (for review)

Supplemental Video 2: The recorded video during spontaneous behavior before and after 4 weeks of MPTP injections in three monkeys.

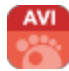

Supplemental  
Video 3 (for review)

Supplemental Video 3: The recorded video during apomorphine rotation test in the unilaterally damaged cynomolgus monkey (C1).

Please download the links of videos in the Google drive below.

[https://drive.google.com/drive/folders/1giLu253rgN\\_-q8JEvnQEih\\_YM3FsLosa?usp=sharing](https://drive.google.com/drive/folders/1giLu253rgN_-q8JEvnQEih_YM3FsLosa?usp=sharing)

Supplemental Table 1: Striatal asymmetry index (SAI) calculated using  $^{18}\text{F}$ -FP-CIT binding potential

|               | Before (a) |       | 8 weeks after MPTP (b) |       | (b-a) |
|---------------|------------|-------|------------------------|-------|-------|
|               | Mean       | SD    | Mean                   | SD    |       |
| C1            | 0.059      | 0.036 | 1.478                  | 0.074 | 1.419 |
| C2            | 0.035      | 0.034 | 0.964                  | 0.221 | 0.930 |
| C3            | 0.045      | 0.051 | 0.038                  | 0.033 | 0.007 |
| IM-MPTP (n=5) | 0.154      | 0.115 | 0.190                  | 0.175 | 0.036 |
