# Supplementary material for: Determination of the Unilaterally Damaged Region May Depend on the Asymmetry of Carotid Blood Flow Velocity in Hemiparkinsonian Monkey: A Pilot Study
Source: Parkinsons Dis. 2022 Nov 9;2022:4382145. doi: 10.1155/2022/4382145 (PMC9668443; doi:10.1155/2022/4382145)
Supplement: Supplementary Materials — Supplemental Figure 1: histogram representing 18F-FP-CIT binding potential in the dorsal striatum and subregions of the globus pallidus after left internal carotid artery infusion of MPTP. The dotted line indicates the contralateral dorsal striatum relative to the MPTP-infused side. Binding potential, BP; Contra, Contralateral; Ipsi, Ipsilateral. Supplemental Figure 2: (a) magnetic resonance angiography (MRA) depicting the symmetric structure of the circle of Willis (CoW) in the cerebral arteries of all MPTP-infused cynomolgus monkeys. Supplemental Figure 3: parkinsonian behavior scores were evaluated using the Kurlan scale. Parkinsonian behavior scores were increased after left internal carotid artery infusion of MPTP in unilaterally (C1) and bilaterally (C2) damaged cynomolgus monkeys. Parkinsonian behavior scores of the undamaged cynomolgus monkey (C3) were completely recovered despite an additional infusion of MPTP. ∗Additional contralateral infusion of MPTP in the undamaged cynomolgus monkey (C3). Supplemental Figure 4: injection of saline was repeated thrice within 28 to 30 weeks, once a week, following MPTP infusion, for comparison with the apomorphine rotation test. The ipsilateral rotations (negative values) were predominantly observed in C1 and C2 monkeys (blue and orange bars) after saline injection. Contrastingly, ipsilateral and contralateral rotations were equally observed in the C3 monkey (gray bar). Plot, mean with standard deviation. Supplemental Video 1: computed tomography angiography (CTA) depicting unilateral cerebral blood flow using a contrast media. Supplemental Video 2: the recorded video of spontaneous behavior before and after 4 weeks of MPTP injections in three monkeys. Supplemental Video 3: the recorded video during the apomorphine rotation test in the unilaterally damaged cynomolgus monkey (C1). Supplemental Table 1: striatal asymmetry index (SAI) calculated using 18F-FP-CIT binding potential. [file 4382145.f1.zip]

Archive with 4 entries (4 files):
- Suppemental materials.pdf
- Suppemental Video 1.avi
- Suppemental Video 2 (for review only).avi
- Suppemental Video 3 (for review only).avi
